# Supplementary material for: An Ensemble Spatiotemporal Model for Predicting PM2.5 Concentrations
Source: Int J Environ Res Public Health. 2017 May 22;14(5):549. doi: 10.3390/ijerph14050549 (PMC5451999; doi:10.3390/ijerph14050549)
Supplement: Supplementary file 1 [file ijerph-14-00549-s001.pdf]

**Table S1.** An annex table for technical terms.

| Name         | Description                                                                                                                                                                                                         |
|--------------|---------------------------------------------------------------------------------------------------------------------------------------------------------------------------------------------------------------------|
| AOT          | Aerosol optical thickness: the degree to which aerosols prevent the transmission of light by absorption or scattering of light; usually extracted from MODIS satellite images.                                      |
| bagging      | A machine learning method for generating multiple versions of a predictor and using these to get an aggregated predictor.                                                                                           |
| CV R2        | Cross validation R-squared                                                                                                                                                                                          |
| GAM          | Generalized additive model                                                                                                                                                                                          |
| LUR          | Land use regression                                                                                                                                                                                                 |
| Residual     | Difference between the observed values and the means predicted by individual or multiple GAMs                                                                                                                       |
| nugget       | Variogram parameters<br>At an infinitely small separation distance, the semivariogram often exhibits a nugget effect, which is a value greater than 0 that reflects the variance at the discontinuity at the origin |
| partial sill | A partial sill is the sill minus the nuggets, and the sill is the limit value at which the semivariogram model attains the range                                                                                    |
| range        | The distance where the semivariogram model first flattens                                                                                                                                                           |

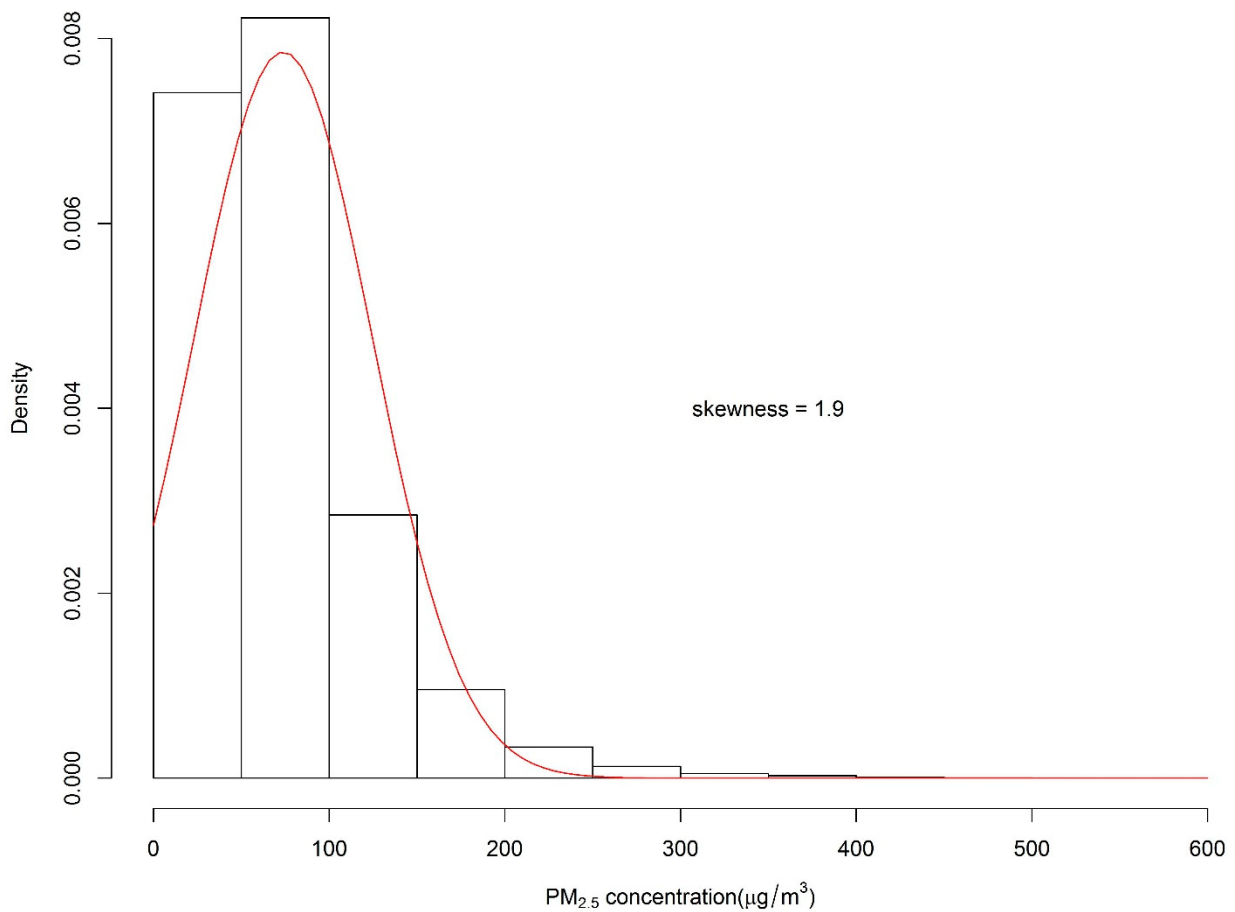

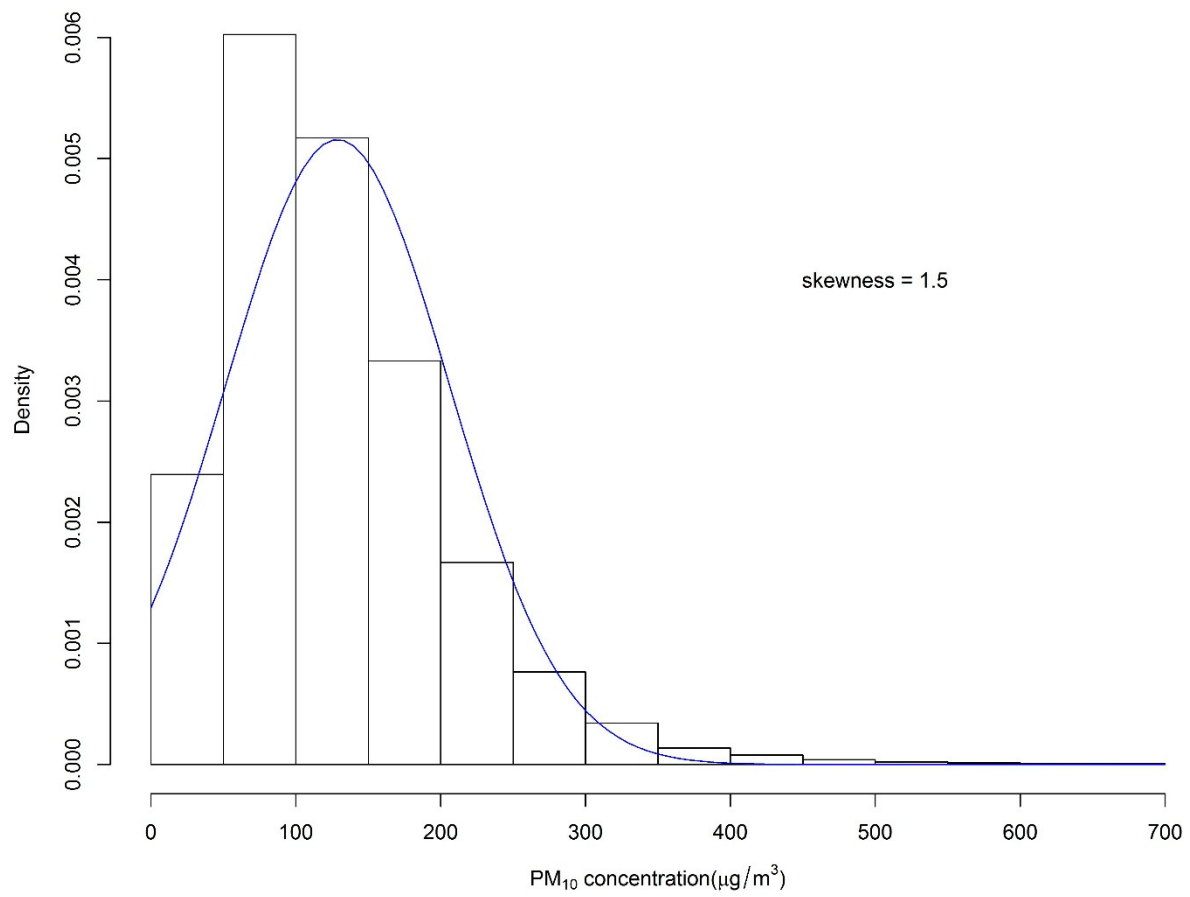

**Figure S1.** Histogram with normal density plot of PM<sub>2.5</sub> and PM<sub>10</sub>.

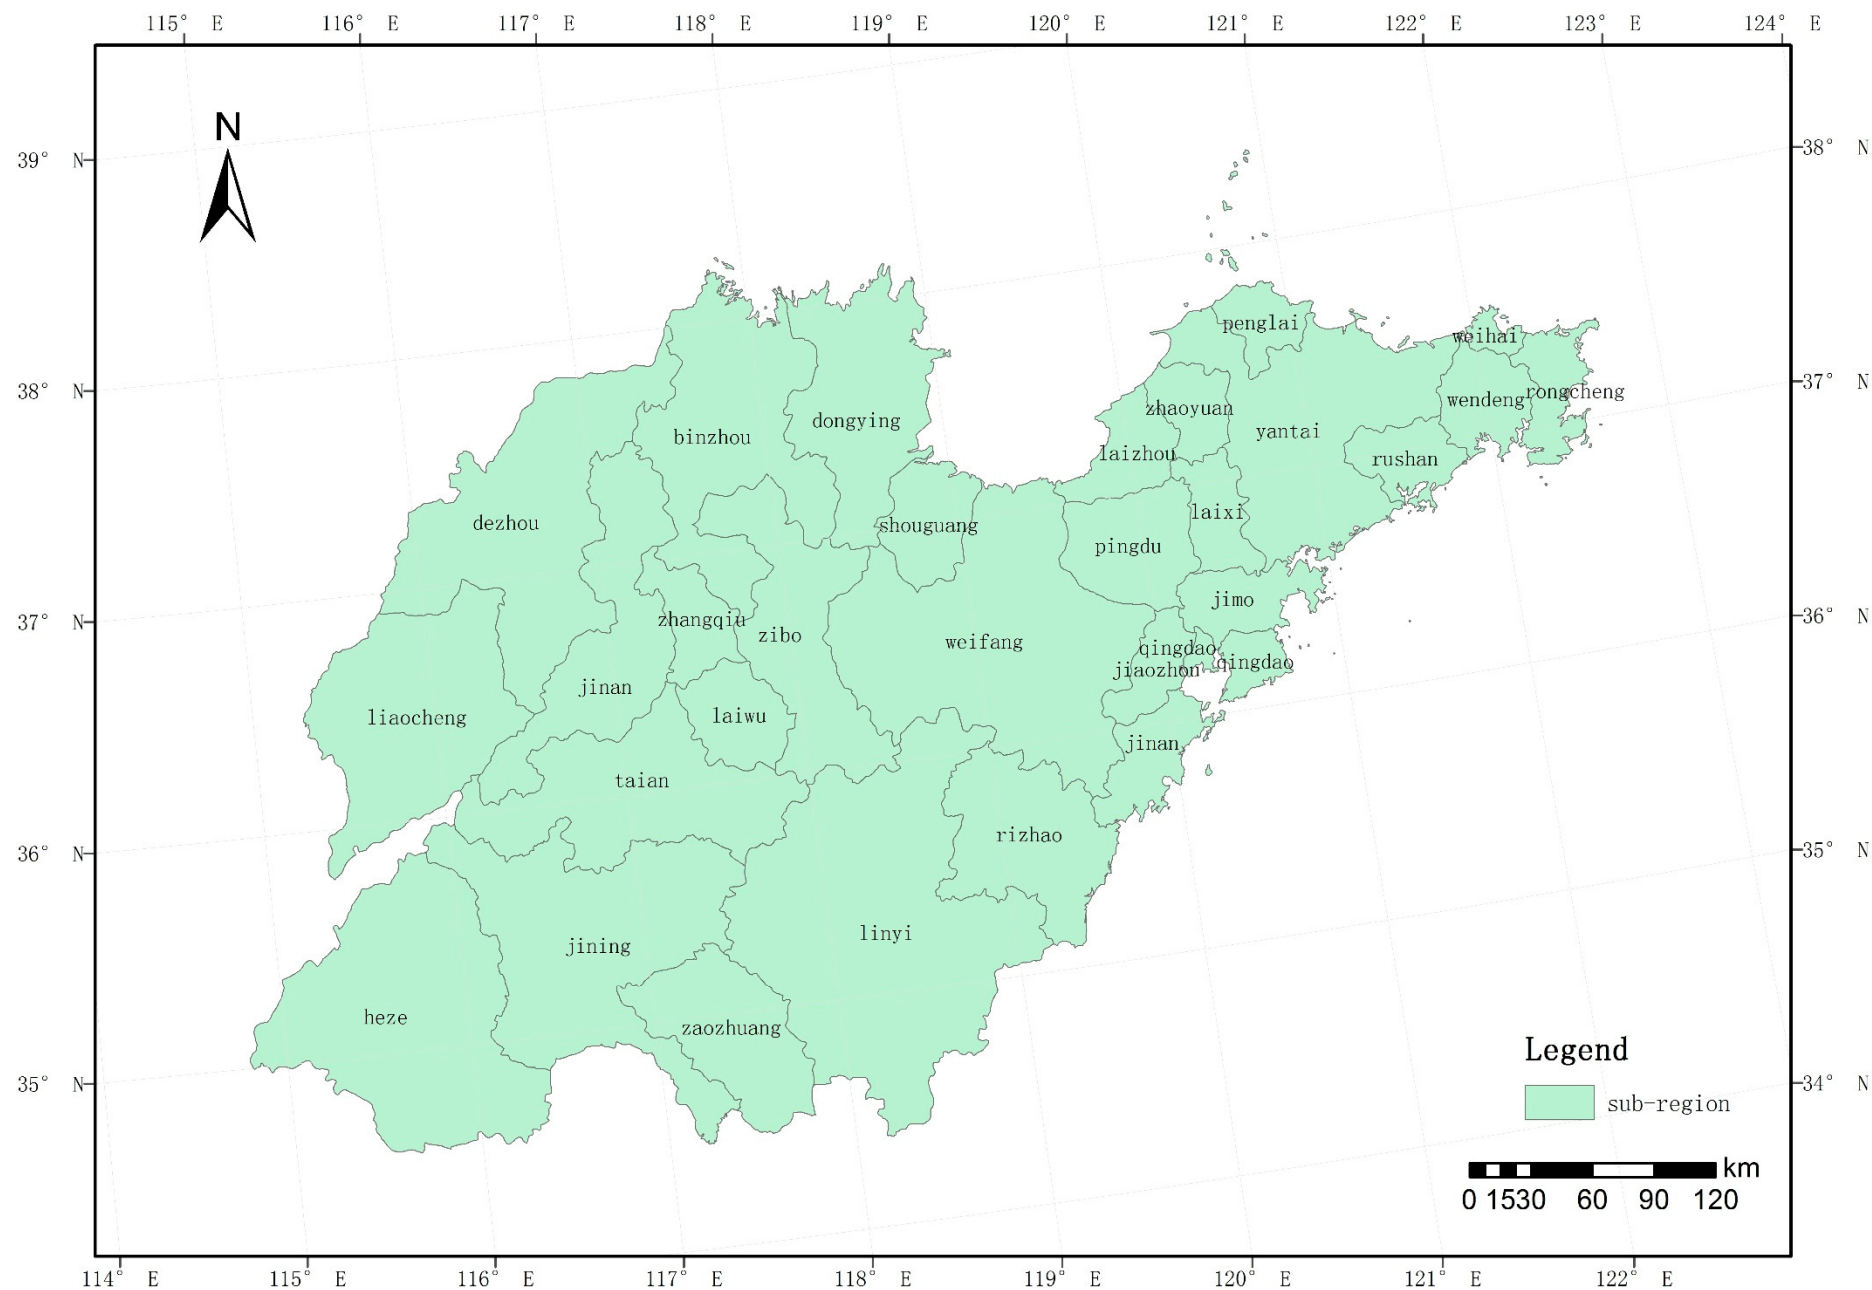

Figure S2. Thirty sub-regions in Shandong province.

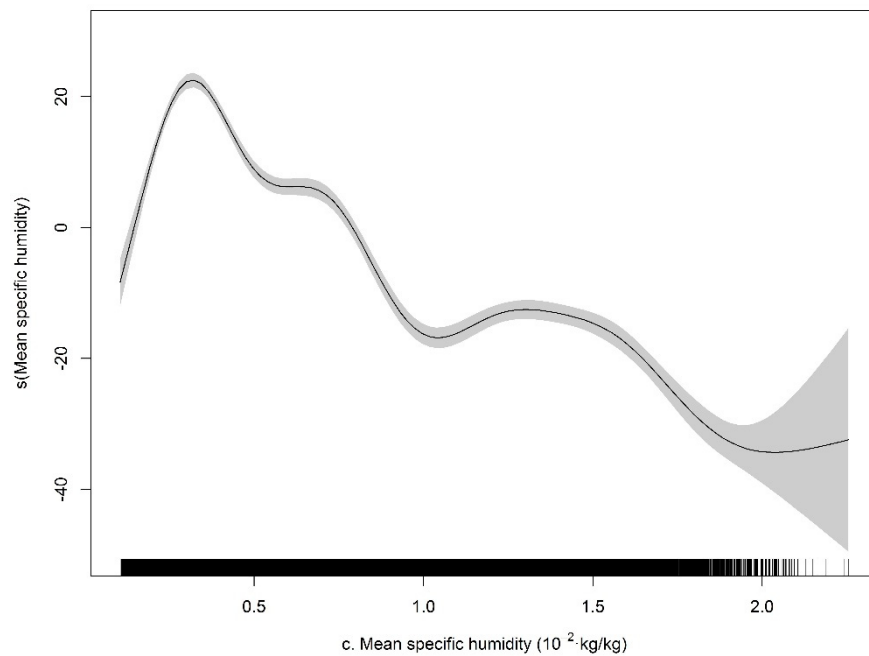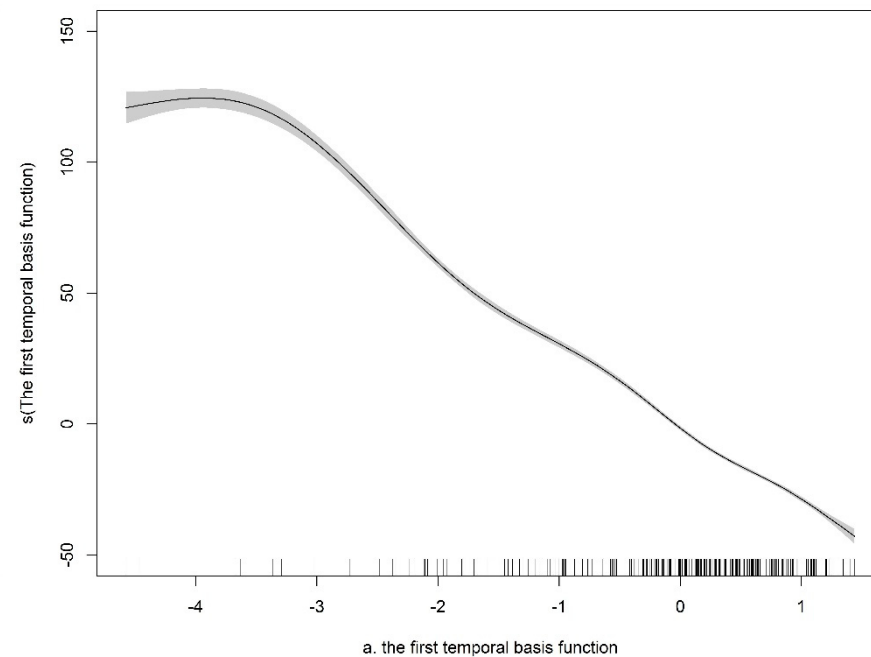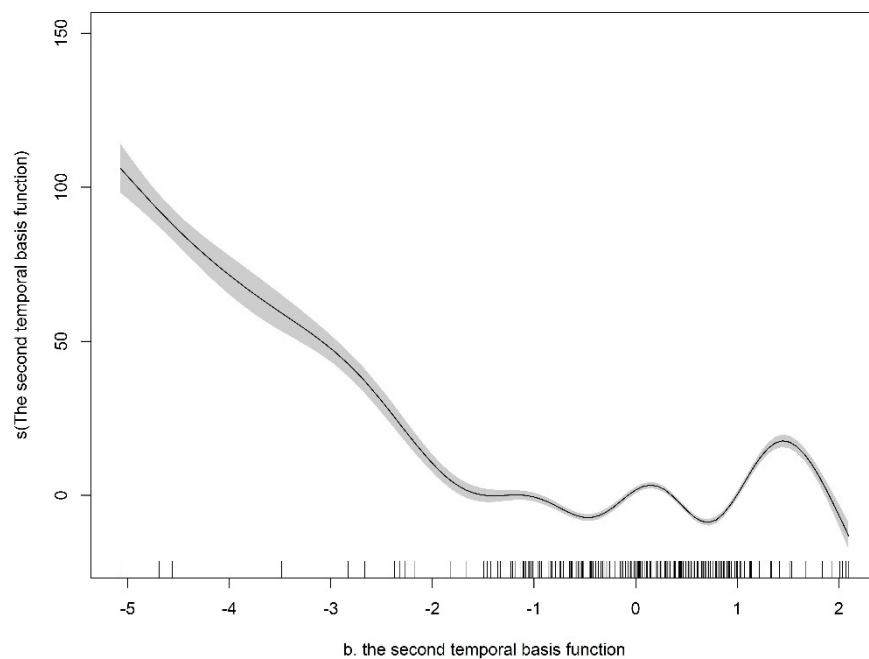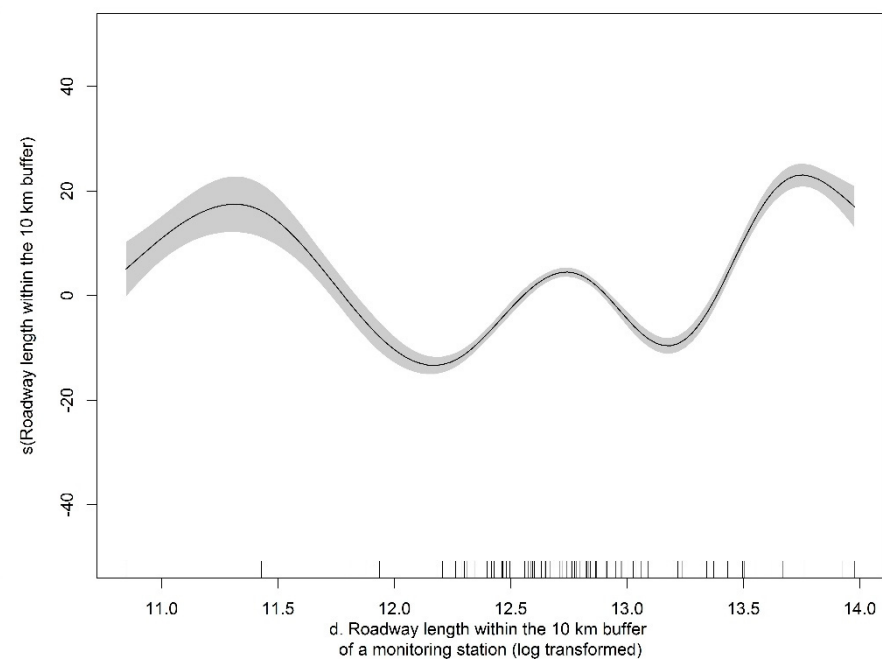

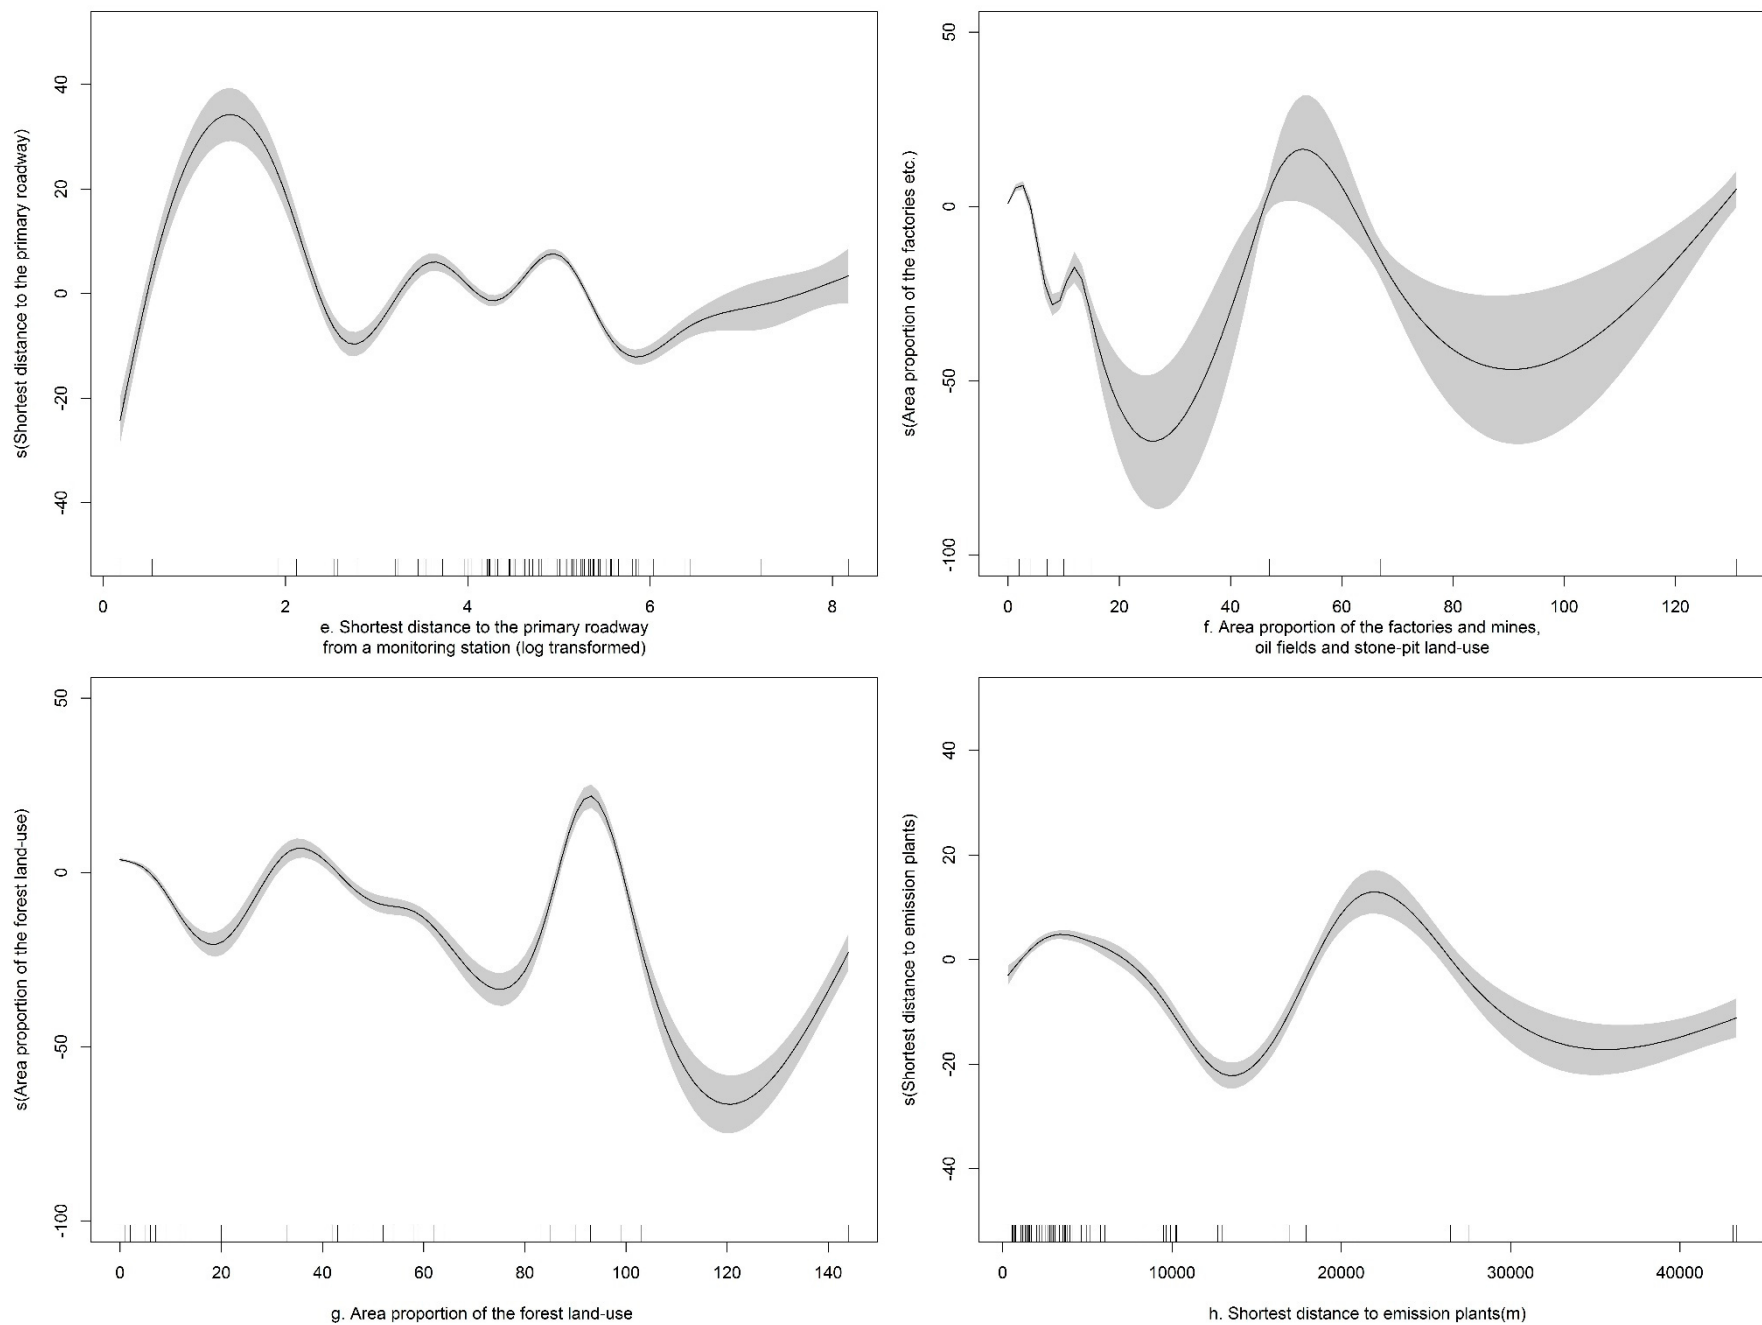

**Figure S3.** Associations of predictive covariates and  $PM_{2.5}$ .

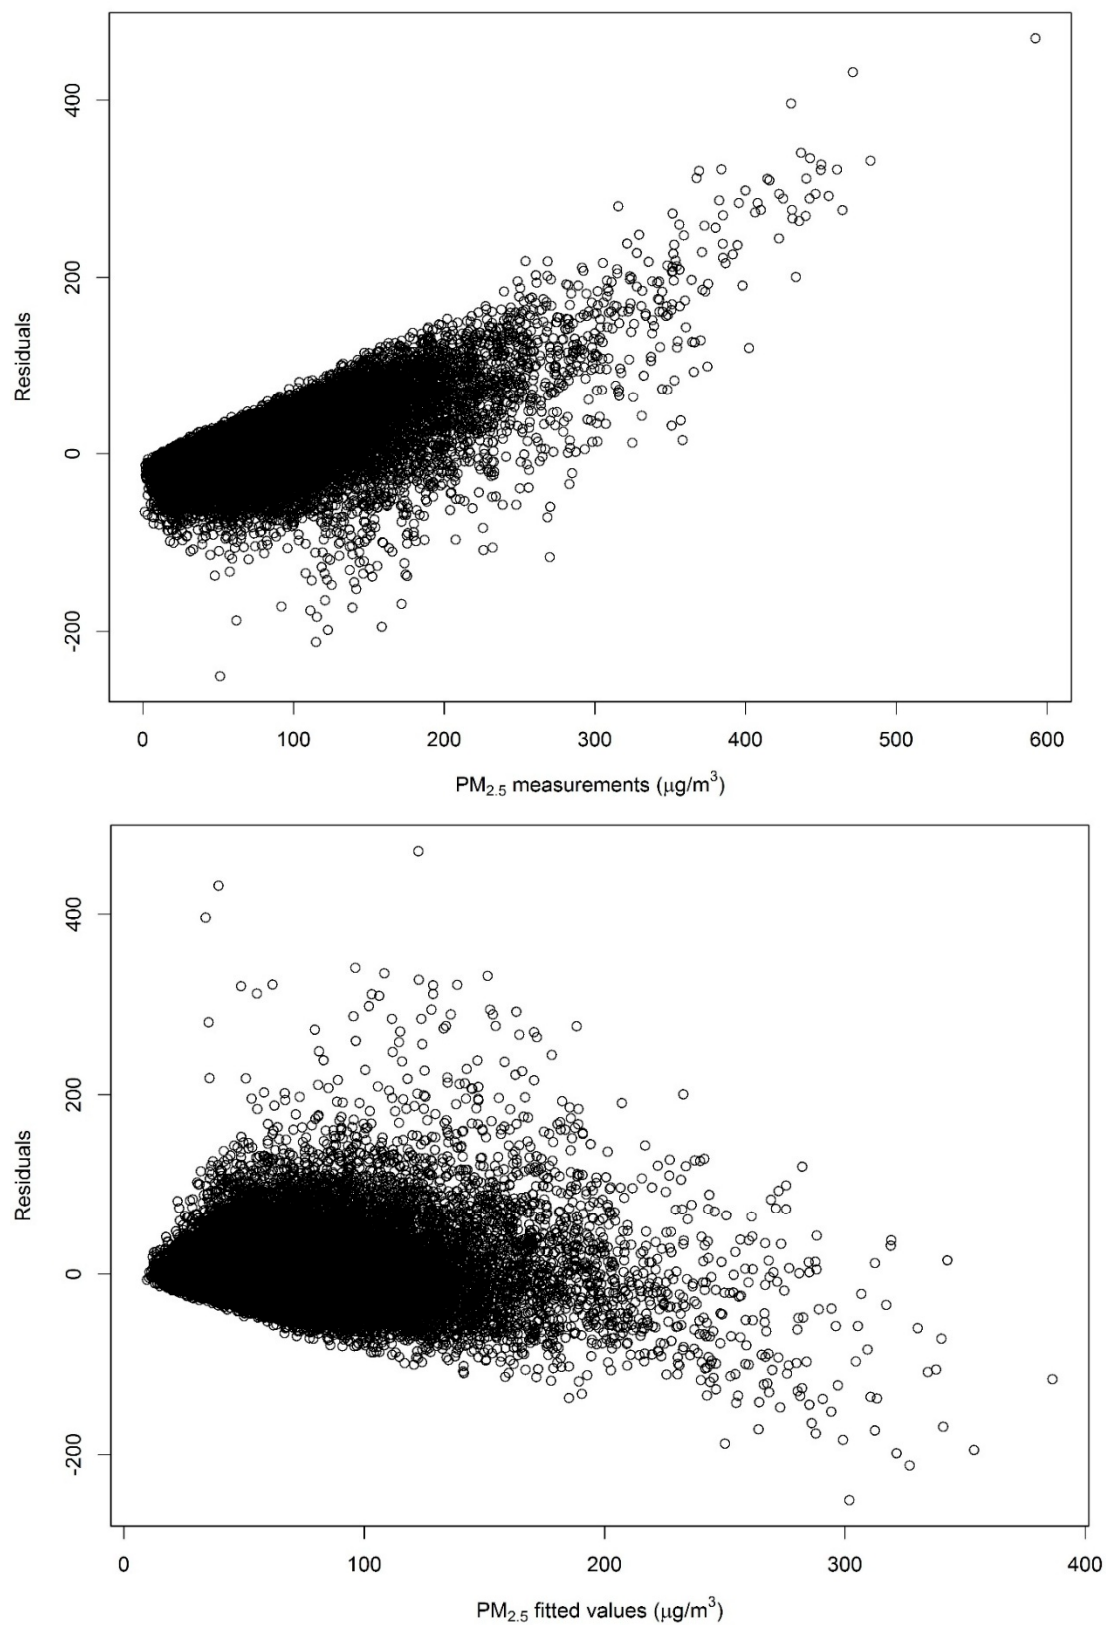

**Figure S4.** Residual plots for the measured and fitted PM<sub>2.5</sub> in Model 4 (no PM<sub>10</sub> used but including estimates of the residuals).

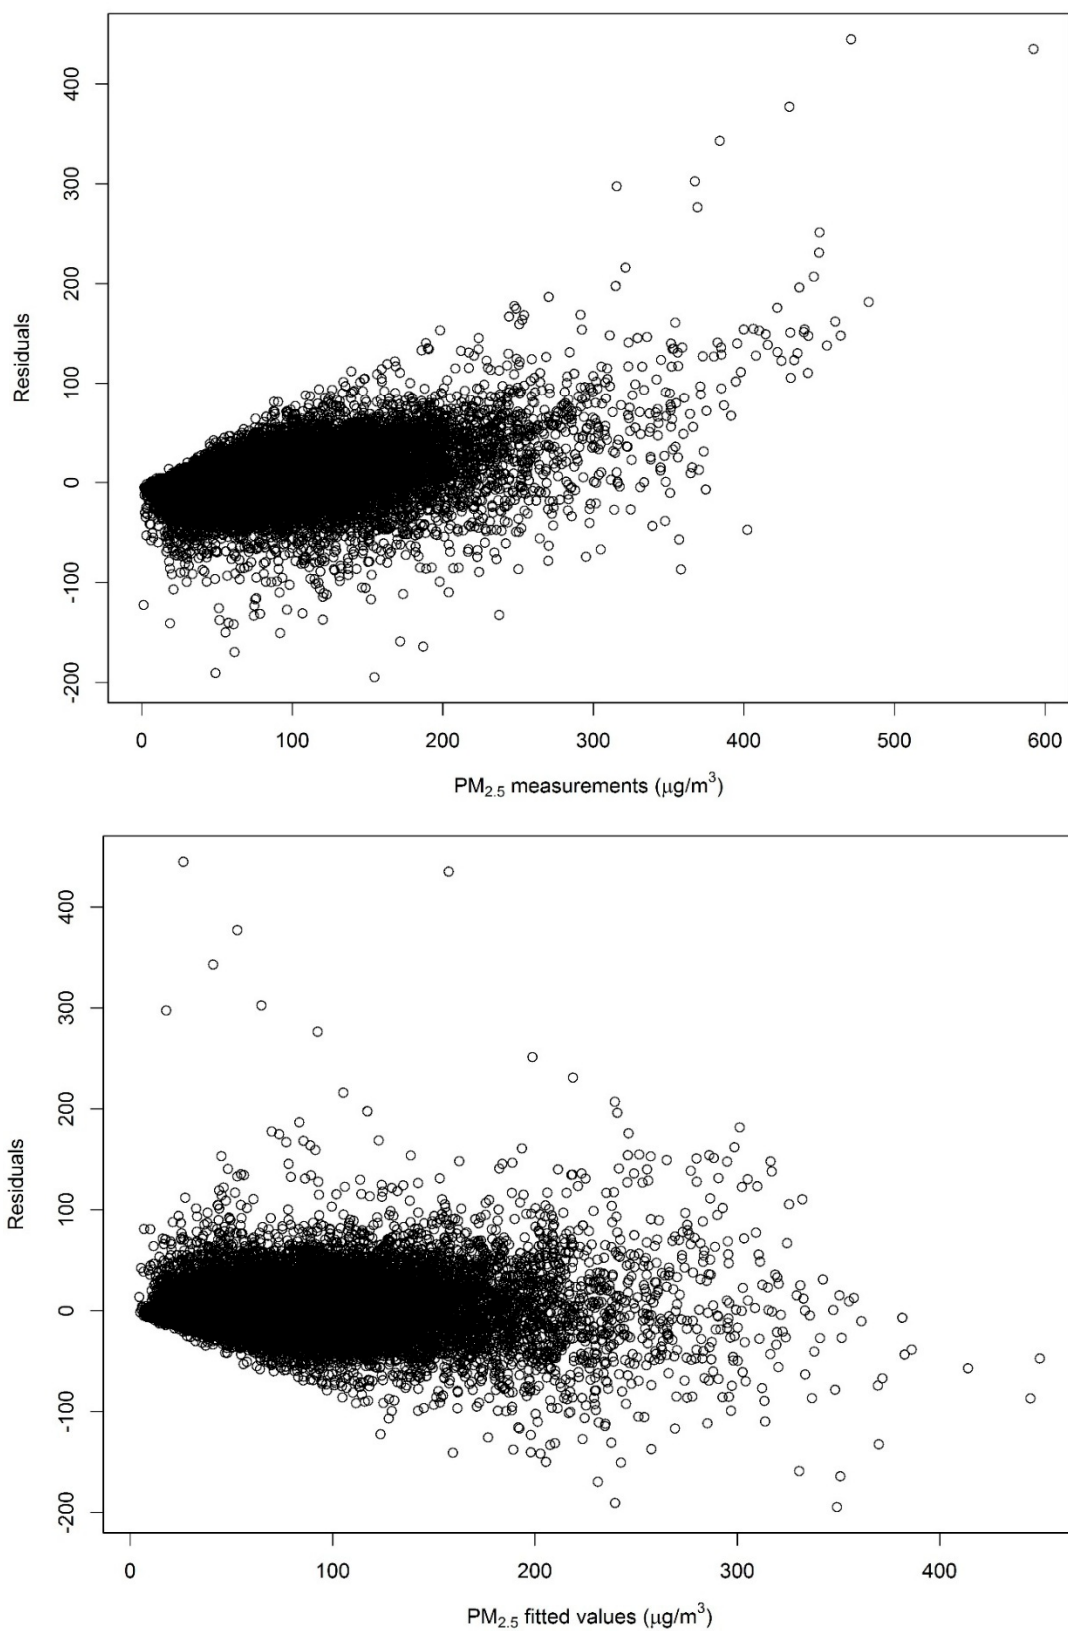

**Figure S5.** Residual plots for the measured and predicted PM<sub>2.5</sub> in Model 6 (PM<sub>10</sub> used and incorporation of estimates of the residuals).

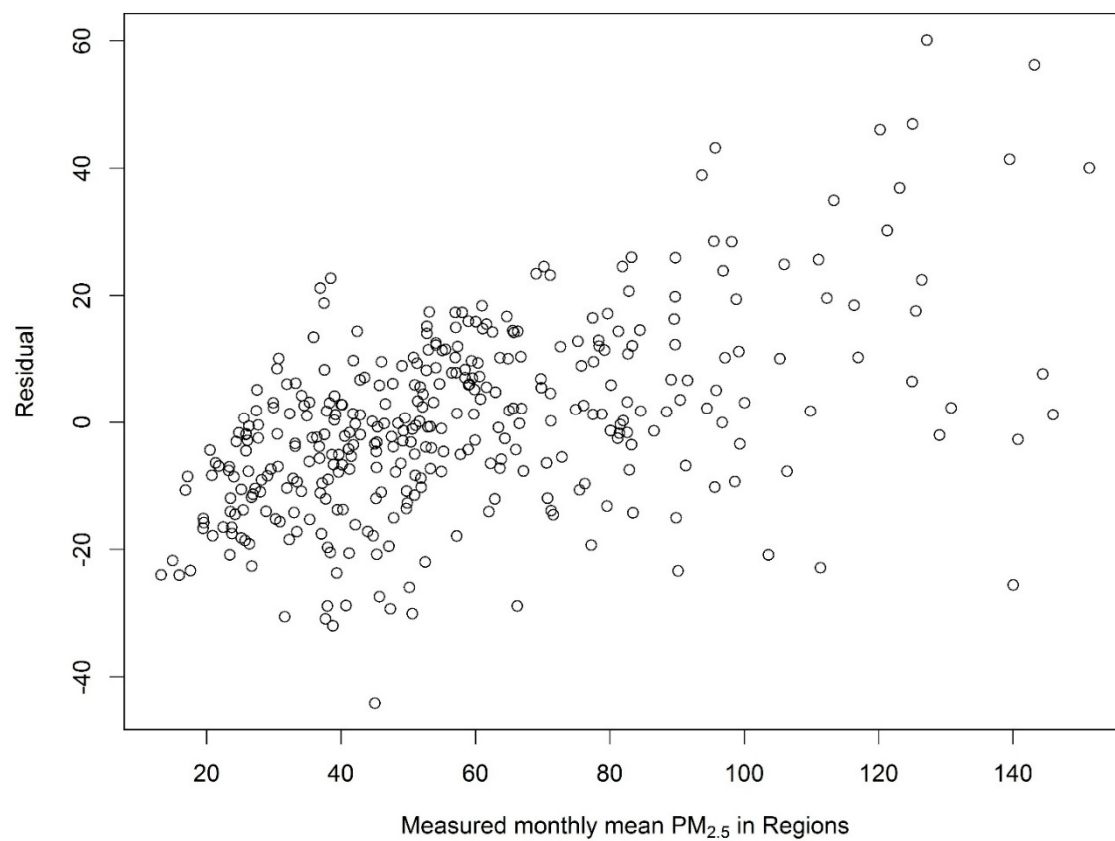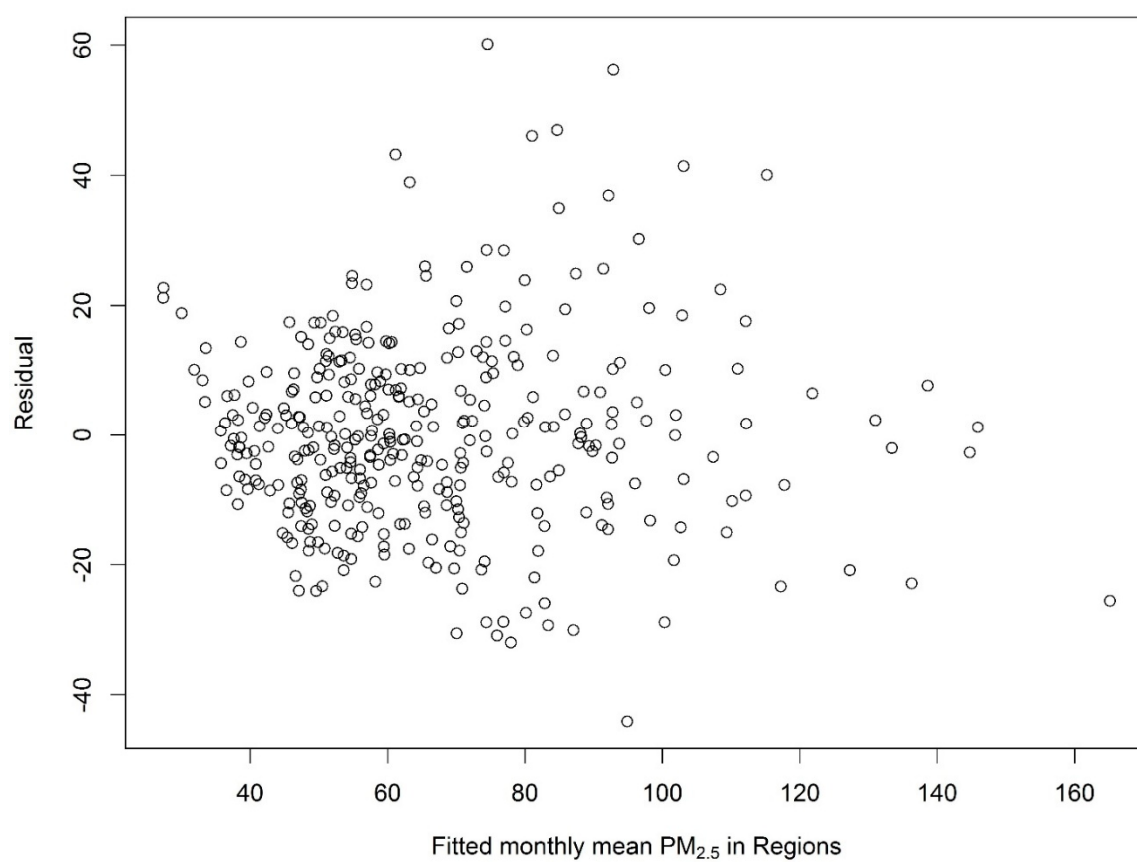

**Figure S6.** Residual plots for the measured and predicted monthly-mean  $PM_{2.5}$  in regions.
